# Supplementary material
Source: MDPI journal article supplement (https://www.mdpi.com/1424-2818/15/11/1116)
Supplement: s1 [file s1]

Table S1. Oligonucleotide ISSR primers used for diversity analysis in common reed sites and populations, primer annealing temperature, number of scored and polymorphic bands, percentage of polymorphic loci identified per primer and scored DNA fragments size range

| ISSR primer | Sequence                | Annealing temperature | All fragments scored | Polymorphic fragments | P, % | Size of DNA fragments (bp) |
|-------------|-------------------------|-----------------------|----------------------|-----------------------|------|----------------------------|
| ISSR-B      | (AG) <sub>8</sub> CG    | 51                    | 25                   | 23                    | 92   | 320-1300                   |
| ISSR I-50a  | CCA(GTC) <sub>4</sub>   | 47                    | 33                   | 31                    | 94   | 440-1750                   |
| ISSR I-18   | GTGC(TC) <sub>7</sub>   | 51                    | 26                   | 25                    | 96   | 490-1480                   |
| ISSR-E      | (CCA) <sub>5</sub>      | 47                    | 21                   | 20                    | 95   | 460-1300                   |
| UBC 881     | (GGGT) <sub>3</sub> GTG | 49                    | 28                   | 26                    | 93   | 310-1600                   |
| UBC 817     | (CA) <sub>8</sub> A     | 45                    | 28                   | 26                    | 93   | 340-1500                   |
| UBC 825     | (AC) <sub>8</sub> T     | 45                    | 33                   | 31                    | 94   | 360-2000                   |
| sum         |                         |                       | 194                  | 182                   | 94   |                            |
| average     |                         |                       | 27.71                | 26                    |      |                            |

P – percentage of polymorphic loci.

Table S2. Water hydro-chemical and physical characteristics of common reed sampling sites

| Site | pH    | DO,<br>mg/l | BOD <sub>7</sub> ,<br>mg/l O <sub>2</sub> | NH <sub>4</sub> -N,<br>mg/l | NO <sub>2</sub> -N,<br>mg/l | NO <sub>3</sub> -N,<br>mg/l | Mineral<br>N, mg/l | Total<br>N, mg/l | PO <sub>4</sub> -P,<br>mg/l | Total P,<br>mg/l | SEC,<br>μS/cm |
|------|-------|-------------|-------------------------------------------|-----------------------------|-----------------------------|-----------------------------|--------------------|------------------|-----------------------------|------------------|---------------|
| VR2  | 7.717 | 8,992       | 3.417                                     | 0.193                       | 0.013                       | 1.503                       | 1.709              | 2.575            | 0.029                       | 0.083            | 460.333       |
| MR1  | 7.973 | 10,389      | 1.938                                     | 0.067                       | 0.010                       | 0.860                       | 0.938              | 1.273            | 0.044                       | 0.079            | 405.125       |
| MR2  | 7.973 | 10,389      | 1.938                                     | 0.067                       | 0.010                       | 0.860                       | 0.938              | 1.273            | 0.044                       | 0.079            | 405.125       |
| MR3  | 7.973 | 10,389      | 1.938                                     | 0.067                       | 0.010                       | 0.860                       | 0.938              | 1.273            | 0.044                       | 0.079            | 405.125       |
| MR4  | 7.982 | 9,844       | 2.064                                     | 0.078                       | 0.009                       | 0.847                       | 0.925              | 1.523            | 0.039                       | 0.089            | 434.194       |
| MR5  | 7.982 | 9,844       | 2.064                                     | 0.078                       | 0.009                       | 0.847                       | 0.925              | 1.523            | 0.039                       | 0.089            | 434.194       |
| MR6  | 8.201 | 10,941      | 2.175                                     | 0.062                       | 0.009                       | 0.866                       | 0.930              | 1.609            | 0.041                       | 0.089            | 425.676       |
| SK   | 8.033 | 11,056      | 1.833                                     | 0.056                       | 0.003                       | 0.154                       | 0.207              | 0.411            | 0.050                       | 0.088            | 273.250       |
| GR1  | 7.675 | 9,925       | 3.900                                     | 0.183                       | 0.006                       | 0.388                       | 0.576              | 1.250            | 0.030                       | 0.113            | 286.000       |
| GR2  | 8.100 | 11,250      | 1.825                                     | 0.068                       | 0.005                       | 0.378                       | 0.450              | 0.863            | 0.057                       | 0.096            | 271.125       |
| VS1  | 7.713 | 8,708       | 2.383                                     | 0.112                       | 0.015                       | 1.419                       | 1.546              | 2.170            | 0.033                       | 0.100            | 490.667       |
| VS2  | 8.050 | 9,763       | 2.388                                     | 0.082                       | 0.009                       | 0.970                       | 1.060              | 1.800            | 0.033                       | 0.081            | 473.875       |
| SL1  | 7.773 | 8,959       | 2.825                                     | 0.154                       | 0.028                       | 1.638                       | 1.820              | 2.409            | 0.071                       | 0.132            | 477.667       |
| SL2  | 8.025 | 9,224       | 2.088                                     | 0.042                       | 0.011                       | 1.073                       | 1.125              | 1.324            | 0.039                       | 0.106            | 420.000       |
| SL3  | 8.025 | 9,224       | 2.088                                     | 0.042                       | 0.011                       | 1.073                       | 1.125              | 1.324            | 0.039                       | 0.106            | 420.000       |
| SL4  | 8.025 | 9,224       | 2.088                                     | 0.042                       | 0.011                       | 1.073                       | 1.125              | 1.324            | 0.039                       | 0.106            | 420.000       |
| BR   | 7.298 | 8,695       | 2.725                                     | 0.046                       | 0.016                       | 1.901                       | 1.963              | 2.493            | 0.035                       | 0.067            | 391.500       |
| VN2  | 8.020 | 11,120      | 2.000                                     | 0.050                       | 0.009                       | 0.646                       | 0.704              | 1.017            | 0.016                       | 0.025            | 484.750       |
| NV1  | 7.700 | 9,063       | 1.688                                     | 0.083                       | 0.014                       | 1.523                       | 1.621              | 2.578            | 0.013                       | 0.032            | 614.750       |
| NV2  | 7.700 | 9,063       | 1.688                                     | 0.083                       | 0.014                       | 1.523                       | 1.621              | 2.578            | 0.013                       | 0.032            | 614.750       |
| NV3  | 7.700 | 9,063       | 1.688                                     | 0.083                       | 0.014                       | 1.523                       | 1.621              | 2.578            | 0.013                       | 0.032            | 614.750       |
| NV4  | 7.799 | 8,359       | 1.846                                     | 0.057                       | 0.021                       | 2.286                       | 2.364              | 3.579            | 0.047                       | 0.063            | 688.810       |
| PN1  | 7.892 | 9,592       | 2.350                                     | 0.048                       | 0.010                       | 1.641                       | 1.699              | 2.615            | 0.018                       | 0.054            | 667.167       |
| PN2  | 7.733 | 7,450       | 3.513                                     | 0.361                       | 0.024                       | 1.439                       | 1.824              | 3.238            | 0.076                       | 0.154            | 660.500       |
| SR1  | 8.073 | 9,085       | 1.988                                     | 0.056                       | 0.014                       | 1.022                       | 1.093              | 1.743            | 0.025                       | 0.057            | 532.125       |
| SR2  | 7.918 | 9,278       | 2.442                                     | 0.051                       | 0.023                       | 1.027                       | 1.101              | 1.541            | 0.053                       | 0.084            | 487.875       |
| ST2  | 8.013 | 11,486      | 2.120                                     | 0.043                       | 0.010                       | 1.203                       | 1.257              | 1.897            | 0.022                       | 0.085            | 486.917       |
| SP1  | 8.036 | 9,079       | 3.320                                     | 0.085                       | 0.010                       | 0.375                       | 0.487              | 1.005            | 0.026                       | 0.059            | 489.912       |
| SP2  | 7.960 | 8,045       | 3.432                                     | 0.254                       | 0.022                       | 0.558                       | 0.834              | 1.552            | 0.068                       | 0.109            | 517.625       |
| SP3  | 7.960 | 8,045       | 3.432                                     | 0.254                       | 0.022                       | 0.558                       | 0.834              | 1.552            | 0.068                       | 0.109            | 517.625       |
| KN1  | 7.924 | 9,987       | 1.639                                     | 0.028                       | 0.004                       | 0.174                       | 0.209              | 0.489            | 0.017                       | 0.041            | 352.729       |
| KN2  | 7.924 | 9,987       | 1.639                                     | 0.028                       | 0.004                       | 0.174                       | 0.209              | 0.489            | 0.017                       | 0.041            | 352.729       |

DO – dissolved oxygen, BOD<sub>7</sub> – biochemical oxygen demand, SEC – specific electrical conductivity.
